# Supplementary material for: Exploring the Role of GMMA Components in the Immunogenicity of a 4-Valent Vaccine against Shigella
Source: MDPI journal article supplement (doi:10.3390/ijms24032742), 2023-02-01
Supplement: s1 [file s1]

**Table S1.** Most represented proteins on *S. flexneri* 1b OAg-positive and OAg-negative GMMA. CV: coefficient of variation. \* t-test on difference between w/w values.

| <i>S. flexneri</i> 1b GMMA |       |                                                                  |                  |     |                  |      |                          |
|----------------------------|-------|------------------------------------------------------------------|------------------|-----|------------------|------|--------------------------|
| Accession number           | MW    | Protein                                                          | OAg <sup>-</sup> |     | OAg <sup>+</sup> |      | Significance<br>p-value* |
|                            |       |                                                                  | %<br>(w/w)       | CV  | % (w/w)          | CV   |                          |
| WP_000865562.1             | 41402 | porin OmpC [Enterobacteriaceae]                                  | 29.1             | 5%  | 33.3             | 1%   | 0.129                    |
| WP_005047463.1             | 37283 | porin OmpA [Enterobacteriaceae]                                  | 32.8             | 6%  | 23.4             | 1%   | 0.086                    |
| WP_001295296.1             | 18603 | outer membrane protein OmpX [Bacteria]                           | 5.8              | 20% | 4.9              | 7%   | 0.451                    |
| WP_000648420.1             | 8323  | murein lipoprotein Lpp [Bacteria]                                | 5.0              | 5%  | 3.5              | 41%  | 0.382                    |
| WP_000735285.1             | 53799 | outer membrane channel protein TolC [Enterobacteriaceae]         | 4.2              | 4%  | 6.0              | 5%   | <b>0.030</b>             |
| WP_000597196.1             | 15602 | outer membrane lipoprotein SlyB [Proteobacteria]                 | 2.4              | 20% | 2.3              | 25%  | 0.969                    |
| WP_000742443.1             | 49381 | serine endoprotease DegP [Enterobacteriaceae]                    | 2.4              | 4%  | 3.2              | 5%   | 0.045                    |
| WP_001295307.1             | 45956 | Tol-Pal system protein TolB [Proteobacteria]                     | 1.9              | 16% | 1.6              | 2%   | 0.355                    |
| WP_000249126.1             | 72755 | penicillin-binding protein activator LpoA [Enterobacteriaceae]   | 1.5              | 1%  | 0.6              | 116% | 0.282                    |
| WP_001297320.1             | 36842 | outer membrane protein assembly factor BamC [Proteobacteria]     | 1.4              | 4%  | 2.3              | 4%   | <b>0.013</b>             |
| WP_001240896.1             | 90553 | outer membrane protein assembly factor BamA [Proteobacteria]     | 1.3              | 2%  | 1.8              | 3%   | <b>0.027</b>             |
| WP_000977934.1             | 39363 | porin OmpF [Enterobacteriaceae]                                  | 1.2              | 5%  | 2.1              | 2%   | <b>0.007</b>             |
| WP_011069568.1             | 80957 | ferric aerobactin receptor IutA [Enterobacteriaceae]             | 0.9              | 17% | 1.0              | 9%   | 0.382                    |
| WP_001177043.1             | 41827 | outer membrane protein assembly factor BamB [Enterobacteriaceae] | 0.9              | 2%  | 1.5              | 5%   | <b>0.045</b>             |
| WP_000163771.1             | 27831 | scaffolding protein MipA [Proteobacteria]                        | 0.5              | 43% | 0.6              | 16%  | 0.714                    |
| Tot (w/w)                  |       |                                                                  | 91.4             |     | 88.1             |      |                          |

**Table S2.** Most represented proteins on *S. flexneri* 2a OAg-positive and OAg-negative GMMA. CV: coefficient of variation, n.d.: not detected. \* t-test on difference between w/w values.

| <i>S. flexneri</i> 2a GMMA |       |                                                                                  |                  |      |                  |      |                       |
|----------------------------|-------|----------------------------------------------------------------------------------|------------------|------|------------------|------|-----------------------|
| Accession number           | MW    | Protein                                                                          | OAg <sup>-</sup> |      | OAg <sup>+</sup> |      | Significance p-value* |
|                            |       |                                                                                  | % (w/w)          | CV   | % (w/w)          | CV   |                       |
| WP_000865562.1             | 41402 | porin OmpC [Enterobacteriaceae]                                                  | 30.5             | 14%  | 31.2             | 13%  | 0.887                 |
| WP_005047463.1             | 37283 | porin OmpA [Enterobacteriaceae]                                                  | 31.7             | 2%   | 16.1             | 2%   | <b>0.006</b>          |
| WP_000648420.1             | 8323  | murein lipoprotein Lpp [Bacteria]                                                | 4.4              | 115% | 7.4              | 8%   | 0.551                 |
| WP_000742443.1             | 49381 | serine endoprotease DegP [Enterobacteriaceae]                                    | 1.3              | 3%   | 6.9              | 6%   | <b>0.032</b>          |
| WP_001295296.1             | 18603 | outer membrane protein OmpX [Bacteria]                                           | 7.0              | 2%   | 3.9              | 6%   | <b>0.010</b>          |
| WP_001240896.1             | 90553 | outer membrane protein assembly factor BamA [Proteobacteria]                     | 0.8              | 116% | 2.9              | 2%   | 0.195                 |
| WP_000597196.1             | 15602 | outer membrane lipoprotein SlyB [Proteobacteria]                                 | 1.8              | 6%   | 2.6              | 29%  | 0.366                 |
| WP_000838272.1             | 28928 | FKBP-type peptidyl-prolyl cis-trans isomerase [Enterobacteriaceae]               | 1.4              | 2%   | 2.1              | 6%   | 0.064                 |
| WP_000735285.1             | 53799 | outer membrane channel protein TolC [Enterobacteriaceae]                         | 0.9              | 5%   | 1.9              | 1%   | <b>0.014</b>          |
| WP_001240896.1             | 39363 | porin OmpF [Enterobacteriaceae]                                                  | 0.8              | 116% | 2.9              | 2%   | 0.195                 |
| WP_001295307.1             | 45956 | Tol-Pal system protein TolB [Proteobacteria]                                     | 0.7              | 114% | 1.6              | 1%   | 0.387                 |
| WP_000249126.1             | 72755 | penicillin-binding protein activator LpoA [Enterobacteriaceae]                   | 1.2              | 0.2% | 1.6              | 0.2% | <b>&lt; 0.001</b>     |
| WP_000800457.1             | 47284 | peptidylprolyl isomerase SurA [Proteobacteria]                                   | 0.7              | 2%   | 1.3              | 4%   | <b>0.037</b>          |
| WP_001297320.1             | 36842 | outer membrane protein assembly factor BamC [Proteobacteria]                     | 0.6              | 1%   | 1.1              | 6%   | 0.064                 |
| WP_001177043.1             | 41827 | outer membrane protein assembly factor BamB [Enterobacteriaceae]                 | 0.5              | 2%   | 1.1              | 3%   | <b>0.013</b>          |
| WP_005049680.1             | 61019 | oligopeptide ABC transporter substrate-binding protein OppA [Enterobacteriaceae] | 0.6              | 4%   | 1.0              | 2%   | <b>0.003</b>          |
| Tot (w/w)                  |       |                                                                                  | <b>84.9</b>      |      | <b>85.6</b>      |      |                       |

**Table S3.** Most represented proteins on *S. flexneri* 3a OAg-positive and OAg-negative GMMA. CV: coefficient of variation, nd: not detected. \* t-test on difference among w/w values.

| <i>S. flexneri</i> 3a GMMA |       |                                                                           |                  |      |                  |      |                       |
|----------------------------|-------|---------------------------------------------------------------------------|------------------|------|------------------|------|-----------------------|
| Accession number           | MW    | Description                                                               | OAg <sup>-</sup> |      | OAg <sup>+</sup> |      | Significance p-value* |
|                            |       |                                                                           | % (w/w)          | CV   | % (w/w)          | CV   |                       |
| WP_000865562.1             | 41402 | porin OmpC<br>[Enterobacteriaceae]                                        | 33.0             | 3%   | 33.1             | 1%   | 0.970                 |
| WP_005047463.1             | 37283 | porin OmpA<br>[Enterobacteriaceae]                                        | 25.9             | 14%  | 22.8             | 2%   | 0.425                 |
| WP_000742443.1             | 49381 | serine endoprotease DegP<br>[Enterobacteriaceae]                          | 2.2              | 18%  | 2.4              | 4%   | 0.689                 |
| WP_000648420.1             | 8323  | murein lipoprotein Lpp<br>[Bacteria]                                      | 7.0              | 29%  | 7.0              | 2%   | 0.988                 |
| WP_001295296.1             | 18603 | outer membrane protein<br>OmpX [Bacteria]                                 | 5.3              | 32%  | 3.4              | 0.4% | 0.351                 |
| WP_001240896.1             | 90553 | outer membrane protein<br>assembly factor BamA<br>[Proteobacteria]        | 2.6              | 24%  | 1.8              | 1%   | 0.338                 |
| WP_000597196.1             | 15602 | outer membrane lipoprotein<br>SlyB [Proteobacteria]                       | 2.3              | 55%  | 2.9              | 1%   | 0.606                 |
| WP_000838272.1             | 28928 | FKBP-type peptidyl-prolyl cis-<br>trans isomerase<br>[Enterobacteriaceae] | 1.0              | 47%  | 1.2              | 5%   | 0.795                 |
| WP_001295307.1             | 45956 | Tol-Pal system protein TolB<br>[Proteobacteria]                           | 1.1              | 42%  | 1.2              | 1%   | 0.696                 |
| WP_001177043.1             | 36842 | outer membrane protein<br>assembly factor BamC<br>[Proteobacteria]        | 1.0              | 9%   | 0.8              | 12%  | 0.223                 |
| WP_001297320.1             | 41827 | outer membrane protein<br>assembly factor BamB<br>[Enterobacteriaceae]    | 1.0              | 22%  | 0.9              | 0.3% | 0.667                 |
| WP_000735285.1             | 53799 | outer membrane channel<br>protein TolC<br>[Enterobacteriaceae]            | 2.7              | 3%   | 2.3              | 2%   | <b>0.034</b>          |
| WP_000800457.1             | 47284 | peptidylprolyl isomerase SurA<br>[Proteobacteria]                         | 0.7              | 128% | 0.6              | 6%   | 0.889                 |
| WP_001295306.1             | 18824 | peptidoglycan-associated<br>lipoprotein Pal<br>[Proteobacteria]           | 0.6              | 120% | 1.3              | 4%   | 0.382                 |
| WP_000768975.1             | 40893 | glycerophosphodiester<br>phosphodiesterase<br>[Enterobacteriaceae]        | 0.7              | 98%  | 1.1              | 6%   | 0.497                 |
| WP_000737226.1             | 22928 | outer membrane protein<br>OmpW [Enterobacteriaceae]                       | 1.3              | 65%  | 1.8              | 4%   | 0.559                 |
| <b>Tot (w/w)</b>           |       |                                                                           | <b>88.4</b>      |      | <b>84.5</b>      |      |                       |

**Table S4.** Most represented proteins on *S. flexneri* OAg-positive GMMA. CV: coefficient of variation, nd: not detected. \*One way Anova or t test.

| OAg <sup>+</sup> GMMA |       |                                                                                        |                       |      |                       |      |                       |      | Significance<br>p-value* |
|-----------------------|-------|----------------------------------------------------------------------------------------|-----------------------|------|-----------------------|------|-----------------------|------|--------------------------|
| Accession<br>number   | MW    | Description                                                                            | <i>S. flexneri</i> 1b |      | <i>S. flexneri</i> 2a |      | <i>S. flexneri</i> 3a |      |                          |
|                       |       |                                                                                        | %<br>(w/w)            | CV   | %<br>(w/w)            | CV   | %<br>(w/w)            | CV   |                          |
| WP_000865562.1        | 41402 | porin OmpC<br>[Enterobacteriaceae]                                                     | 33.3                  | 1%   | 31.2                  | 13%  | 33.1                  | 1%   | 0.657                    |
| WP_005047463.1        | 37283 | porin OmpA<br>[Enterobacteriaceae]                                                     | 23.4                  | 1%   | 16.1                  | 2%   | 22.8                  | 2%   | < 0.001                  |
| WP_001295296.1        | 18603 | outer membrane protein<br>OmpX [Bacteria]                                              | 4.9                   | 7%   | 3.9                   | 6%   | 3.4                   | 0.4% | 0.019                    |
| WP_000648420.1        | 8323  | murein lipoprotein Lpp<br>[Bacteria]                                                   | 3.5                   | 41%  | 7.4                   | 8%   | 7.0                   | 2%   | 0.041                    |
| WP_000735285.1        | 53799 | outer membrane channel<br>protein TolC<br>[Enterobacteriaceae]                         | 6.0                   | 5%   | 1.9                   | 1%   | 2.3                   | 2%   | < 0.001                  |
| WP_000597196.1        | 15602 | outer membrane lipoprotein<br>SlyB [Proteobacteria]                                    | 2.3                   | 25%  | 2.6                   | 29%  | 2.9                   | 1%   | 0.621                    |
| WP_000742443.1        | 49381 | serine endoprotease DegP<br>[Enterobacteriaceae]                                       | 3.2                   | 5%   | 6.9                   | 6%   | 2.4                   | 4%   | 0.001                    |
| WP_001295307.1        | 45956 | Tol-Pal system protein TolB<br>[Proteobacteria]                                        | 1.6                   | 2%   | 1.6                   | 1%   | 1.2                   | 1%   | < 0.001                  |
| WP_000249126.1        | 72755 | penicillin-binding protein<br>activator LpoA<br>[Enterobacteriaceae]                   | 0.6                   | 116% | 1.6                   | 0.2% | nd                    | -    | 0.270                    |
| WP_001297320.1        | 36842 | outer membrane protein<br>assembly factor BamC<br>[Proteobacteria]                     | 2.3                   | 4%   | 1.1                   | 6%   | 0.9                   | 0.3% | < 0.001                  |
| WP_001240896.1        | 90553 | outer membrane protein<br>assembly factor BamA<br>[Proteobacteria]                     | 1.8                   | 3%   | 2.9                   | 2%   | 1.8                   | 1%   | < 0.001                  |
| WP_000977934.1        | 39363 | porin OmpF<br>[Enterobacteriaceae]                                                     | 2.1                   | 2%   | nd                    | -    | nd                    | -    | -                        |
| WP_011069568.1        | 80957 | ferric aerobactin receptor IutA<br>[Enterobacteriaceae]                                | 1.0                   | 9%   | nd                    | -    | nd                    | -    | -                        |
| WP_001177043.1        | 41827 | outer membrane protein<br>assembly factor BamB<br>[Enterobacteriaceae]                 | 1.5                   | 5%   | 1.1                   | 3%   | 0.8                   | 12%  | 0.006                    |
| WP_000163771.1        | 27831 | scaffolding protein MipA<br>[Proteobacteria]                                           | 0.6                   | 16%  | nd                    | -    | nd                    | -    | -                        |
| WP_000838272.1        | 28928 | FKBP-type peptidyl-prolyl cis-<br>trans isomerase<br>[Enterobacteriaceae]              | nd                    | -    | 2.1                   | 6%   | 1.2                   | 5%   | 0.029                    |
| WP_000800457.1        | 47284 | peptidylprolyl isomerase SurA<br>[Proteobacteria]                                      | nd                    | -    | 1.3                   | 4%   | 0.6                   | 6%   | 0.009                    |
| WP_001295306.1        | 18824 | peptidoglycan-associated<br>lipoprotein Pal<br>[Proteobacteria]                        | nd                    | -    | nd                    | -    | 1.3                   | 4%   | -                        |
| WP_000768975.1        | 40893 | glycerophosphodiester<br>phosphodiesterase<br>[Enterobacteriaceae]                     | nd                    | -    | nd                    | -    | 1.1                   | 6%   | -                        |
| WP_000737226.1        | 22928 | outer membrane protein<br>OmpW [Enterobacteriaceae]                                    | nd                    | -    | nd                    | -    | 1.8                   | 4%   | -                        |
| WP_005049680.1        | 61019 | oligopeptide ABC transporter<br>substrate-binding protein<br>OppA [Enterobacteriaceae] | nd                    | -    | 1.0                   | 2%   | nd                    | -    | -                        |
| Total (w/w)           |       |                                                                                        | 88.1                  |      | 82.6                  |      | 84.5                  |      |                          |

**Table S5.** Most represented proteins on *S. flexneri* OAg-negative GMMA. CV: coefficient of variation, nd: not detected. \*One way Anova or t test.

| OAg GMMA            |       |                                                                                  |                       |     |                       |      |                       |      | Significance<br>p-value* |
|---------------------|-------|----------------------------------------------------------------------------------|-----------------------|-----|-----------------------|------|-----------------------|------|--------------------------|
| Accession<br>number | MW    | Description                                                                      | <i>S. flexneri</i> 1b |     | <i>S. flexneri</i> 2a |      | <i>S. flexneri</i> 3a |      |                          |
|                     |       |                                                                                  | %<br>(w/w)            | CV  | %<br>(w/w)            | CV   | %<br>(w/w)            | CV   |                          |
| WP_000865562.1      | 41402 | porin OmpC [Enterobacteriaceae]                                                  | 29.1                  | 5%  | 30.5                  | 14%  | 33.0                  | 3%   | 0.448                    |
| WP_005047463.1      | 37283 | porin OmpA [Enterobacteriaceae]                                                  | 32.8                  | 6%  | 31.7                  | 2%   | 25.9                  | 14%  | 0.115                    |
| WP_001295296.1      | 18603 | outer membrane protein OmpX [Bacteria]                                           | 5.8                   | 20% | 7.0                   | 2%   | 5.3                   | 32%  | 0.466                    |
| WP_000648420.1      | 8323  | murein lipoprotein Lpp [Bacteria]                                                | 5.0                   | 5%  | 4.4                   | 115% | 7.0                   | 29%  | 0.718                    |
| WP_000735285.1      | 53799 | outer membrane channel protein TolC [Enterobacteriaceae]                         | 4.2                   | 4%  | 0.9                   | 5%   | 2.7                   | 3%   | < 0.001                  |
| WP_000597196.1      | 15602 | outer membrane lipoprotein SlyB [Proteobacteria]                                 | 2.4                   | 20% | 1.8                   | 6%   | 2.3                   | 55%  | 0.727                    |
| WP_000742443.1      | 49381 | serine endoprotease DegP [Enterobacteriaceae]                                    | 2.4                   | 4%  | 1.3                   | 3%   | 2.2                   | 18%  | 0.040                    |
| WP_001295307.1      | 45956 | Tol-Pal system protein TolB [Proteobacteria]                                     | 1.9                   | 16% | 0.7                   | 114% | 1.1                   | 42%  | 0.249                    |
| WP_000249126.1      | 72755 | penicillin-binding protein activator LpoA [Enterobacteriaceae]                   | 1.5                   | 1%  | 1.2                   | 0%   | nd                    | -    | 0.032                    |
| WP_001297320.1      | 36842 | outer membrane protein assembly factor BamC [Proteobacteria]                     | 1.4                   | 4%  | 0.6                   | 1%   | 1.0                   | 22%  | 0.020                    |
| WP_001240896.1      | 90553 | outer membrane protein assembly factor BamA [Proteobacteria]                     | 1.3                   | 2%  | 0.8                   | 116% | 2.6                   | 24%  | 0.151                    |
| WP_000977934.1      | 39363 | porin OmpF [Enterobacteriaceae]                                                  | 1.2                   | 5%  | nd                    | -    | nd                    | -    | -                        |
| WP_011069568.1      | 80957 | ferric aerobactin receptor IutA [Enterobacteriaceae]                             | 0.9                   | 17% | nd                    | -    | nd                    | -    | -                        |
| WP_001177043.1      | 41827 | outer membrane protein assembly factor BamB [Enterobacteriaceae]                 | 0.9                   | 2%  | 0.5                   | 2%   | 1.0                   | 9%   | 0.005                    |
| WP_000163771.1      | 27831 | scaffolding protein MipA [Proteobacteria]                                        | 0.5                   | 43% | nd                    | -    | nd                    | -    | -                        |
| WP_000838272.1      | 28928 | FKBP-type peptidyl-prolyl cis-trans isomerase [Enterobacteriaceae]               | nd                    | -   | 1.4                   | 2%   | 1.0                   | 47%  | 0.538                    |
| WP_000800457.1      | 47284 | peptidylprolyl isomerase SurA [Proteobacteria]                                   | nd                    | -   | 0.7                   | 2%   | 0.7                   | 128% | 0.986                    |
| WP_005049680.1      | 61019 | oligopeptide ABC transporter substrate-binding protein OppA [Enterobacteriaceae] | nd                    | -   | 0.6                   | 4%   | nd                    | -    | -                        |
| WP_001295306.1      | 18824 | peptidoglycan-associated lipoprotein Pal [Proteobacteria]                        | nd                    | -   | nd                    | -    | 0.6                   | 120% | -                        |
| WP_000768975.1      | 40893 | glycerophosphodiester phosphodiesterase [Enterobacteriaceae]                     | nd                    | -   | nd                    | -    | 0.7                   | 98%  | -                        |
| WP_000737226.1      | 22928 | outer membrane protein OmpW [Enterobacteriaceae]                                 | nd                    | -   | nd                    | -    | 1.3                   | 65%  | -                        |
| Total (w/w)         |       |                                                                                  | 91.4                  |     | 84.1                  |      | 88.4                  |      |                          |

**Table S6.** Composition of Chemically Defined Medium.

|                                 |                   | Concentration    |                         |                         |                         |
|---------------------------------|-------------------|------------------|-------------------------|-------------------------|-------------------------|
| Reagent                         | Supplier Code#    | <i>S. sonnei</i> | <i>S flexneri</i><br>1b | <i>S flexneri</i><br>2a | <i>S flexneri</i><br>3a |
| Sulfuric Acid                   | VWR -1.00731.1000 | [13]             | 20 µL/kg                | 20 µL/kg                | 20 µL/kg                |
| Manganese chloride tetrahydrate | SIGMA -M8054      |                  | 15 mg/kg                | 15 mg/kg                | 15 mg/kg                |
| Copper Chloride dihydrate       | SIGMA -307483     |                  | 1.5 mg/kg               | 1.5 mg/kg               | 1.5 mg/kg               |
| Boric Acid solution 4%          | SIGMA-31144       |                  | 75 mg/kg                | 75 mg/kg                | 75 mg/kg                |
| Sodium Molybdate Dihydrate      | SIGMA-M1651       |                  | 2.5 mg/kg               | 2.5 mg/kg               | 2.5 mg/kg               |
| Zinc acetate dihydrate          | SIGMA -383058     |                  | 13 mg/kg                | 13 mg/kg                | 13 mg/kg                |
| Hexammine cobalt(III) chloride  | SIGMA-H7891       |                  | 2.5 mg/kg               | 2.5 mg/kg               | 2.5 mg/kg               |
| Ferric Citrate                  | SIGMA -F3388      |                  | 24.5 mg/kg              | 24.5 mg/kg              | 24.5 mg/kg              |
| Magnesium Sulfate heptahydrate  | SIGMA-63138       |                  | 493.0 mg/kg             | 493.0 mg/kg             | 493.0 mg/kg             |
| Thiamine Hydrochloride          | SIGMA-T4562       |                  | 50 mg/kg                | 50 mg/kg                | 50 mg/kg                |
| Nicotinic Acid                  | SIGMA -N0761      |                  | 10 mg/kg                | 10 mg/kg                | 10 mg/kg                |
| Potassium Phosphate Monobasic   | SIGMA-P5655       |                  | 13.3 g/kg               | 13.3 g/kg               | 13.3 g/kg               |
| Di-Ammonium HydrogenPhosphate   | SIGMA-215996      |                  | 4 g/kg                  | 4 g/kg                  | 4 g/kg                  |
| Citric Acid Monohydrate         | SIGMA-C1909       |                  | 1.7 g/kg                | 1.7 g/kg                | 1.7 g/kg                |
| Dextrose monohydrate            | SIGMA -D9559      |                  | 5 g/kg                  | 5 g/kg                  | 5 g/kg                  |
| L-Aspartic acid                 | SIGMA -A7219      |                  | 2.5 g/kg                | 2.5 g/kg                | 2.5 g/kg                |
| L-Methionine                    | SIGMA-M5308       |                  | 0.16 g/kg               | 0 g/kg                  | 0.16 g/kg               |

|                                             |             |  |           |        |           |
|---------------------------------------------|-------------|--|-----------|--------|-----------|
| L-Asparagine                                | SIGMA-A4159 |  | 0.06 g/kg | 0 g/kg | 0.06 g/kg |
| L-Threonine                                 | SIGMA-T8441 |  | 0.22 g/kg | 0 g/kg | 0.22 g/kg |
| L-Lysine monohydrate                        | SIGMA-L5510 |  | 0.60 g/kg | 0 g/kg | 0.67 g/kg |
| L-Glutamic acid monosodium salt monohydrate | SIGMA-49621 |  | 1.78 g/kg | 0 g/kg | 1.78 g/kg |

**Table S7.** HPLC-RP gradient. Solvent A: 5% Acetonitrile, 15% Isopropyl alcohol, 0.3% TFA in water (by volume); Solvent B: 80% Acetonitrile, 15% Isopropyl alcohol, 0.3% TFA in water (by volume); Solvent C: Isopropyl alcohol. Column temperature: 70° C.

| Time    | Flow<br>(mL/min) | %A  | %B  | %C  | Curve   |
|---------|------------------|-----|-----|-----|---------|
| Initial | 0.2              | 100 | 0   | 0   | Initial |
| 2       | 0.2              | 100 | 0   | 0   | 6       |
| 8       | 0.2              | 70  | 30  | 0   | 6       |
| 13      | 0.2              | 55  | 45  | 0   | 6       |
| 24      | 0.2              | 0   | 100 | 0   | 6       |
| 28      | 0.2              | 0   | 100 | 0   | 6       |
| 34      | 0.2              | 0   | 0   | 100 | 6       |
| 44      | 0.2              | 0   | 0   | 100 | 6       |
| 49      | 0.2              | 100 | 0   | 0   | 6       |
| 69      | 0.2              | 100 | 0   | 0   | 6       |

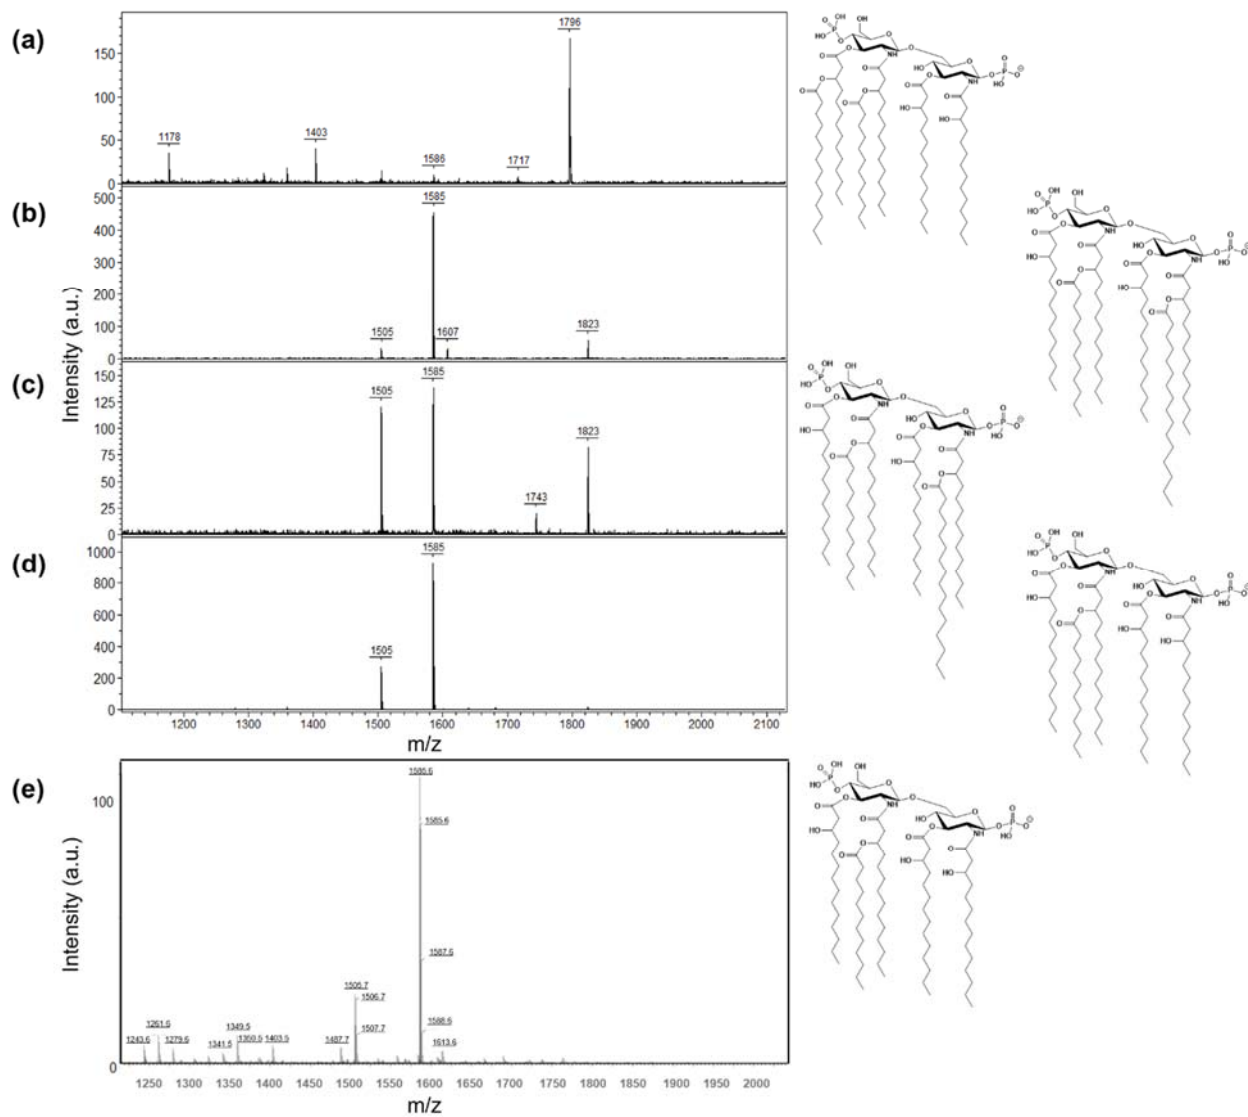

**Figure S1.** MALDI-TOF spectra and structures of lipid A. (a) wild type lipid A, (b) *S. flexneri* 1b GMMA lipid A, (c) *S. flexneri* 2a GMMA lipid A, (d) *S. flexneri* 3a GMMA lipid A, (e) *S. sonnei* GMMA lipid A.



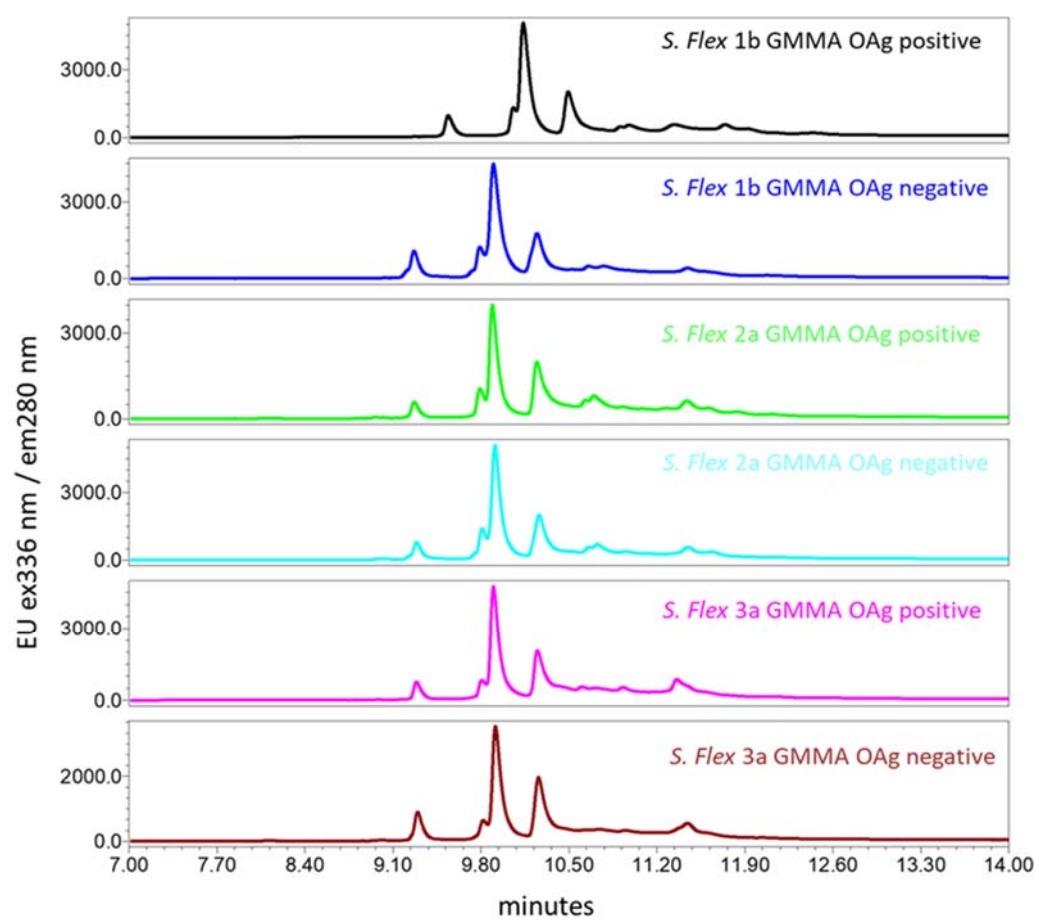

**Figure S2.** GMMA HPLC-RP protein profile.
